# Supplementary material
Source: Springer Nature journal article supplement (https://www.springermedizin.de/resource/supplementary/12960_2013_390_MOESM1_ESM.pdf/9570052)

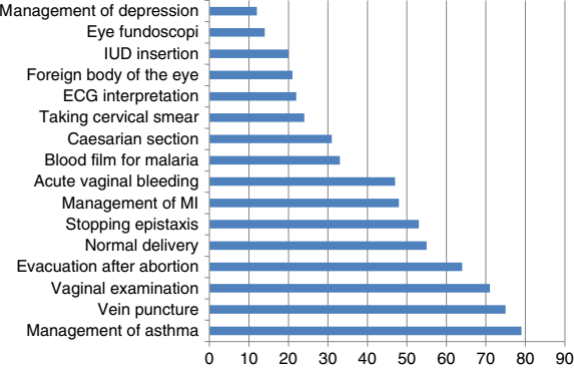

Supplement: MOESM1 [file 9570052]
